# Supplementary material
Source: publisher figshare collection journal article supplement (https://plos.figshare.com/articles/dataset/_/150158)
Supplement: Supplementary file [file 1]

Table S1

| miRNA         | Sequence                  | Chromosome:loci[strand]( * from UCSC,# from Sanger)                       |
|---------------|---------------------------|---------------------------------------------------------------------------|
| hsa-miR-638   | AGGGAUCGCGGGCGGGUGGCGGCCU | *19:10690094-10690119[+]                                                  |
| hsa-miR-302b  | UAAUGGCUUCCAUGUUUUAGUAG   | 4:113789094-113789116[-]                                                  |
| hsa-miR-302d  | UAAUGGCUUCCAUGUUUGAGUGU   | 4:113788611-113788633[-]                                                  |
| hsa-miR-302a  | UAAUGGCUUCCAUGUUUUGGUGA   | 4:113788791-113788813[-]                                                  |
| hsa-miR-302a* | UAAACGUGGAUGUACUUGCUUU    | 4:113788827-113788848[-]                                                  |
| hsa-miR-20a   | UAAAGUGCUUAUAGUGCAGGUAG   | 13:90801327-90801349[+]                                                   |
| hsa-miR-17-5p | CAAAGUGCUUACAGUGCAGGUAGU  | 13:90800873-90800896[+],X:133131940-133131961[-]                          |
| hsa-miR-302c  | UAAUGGCUUCCAUGUUUCAGUGG   | 4:113788971-113788993[+]                                                  |
| hsa-miR-663   | AGGCGGGGCGCCGCGGGACCGC    | 20:26136879-26136900[+],16:33869178-33869197[+]                           |
| hsa-miR-20b   | CAAAGUGCUCAUAGUGCAGGUAG   | X:133131546-133131568[-]                                                  |
| hsa-miR-106a  | AAAAGUGCUUACAGUGCAGGUAGC  | X:133131939-133131962[-],13:90800874-90800895[+]                          |
| hsa-miR-25    | CAUUGCACUUGUCUCGGUCUGA    | 7:99529130-99529151[-]                                                    |
| hsa-miR-92    | UAUUGCACUUGUCCCGGCCUG     | 13:90801616-90801636[+],X:133131241-133131261[-]                          |
| hsa-miR-21    | UAGCUUAUCAGACUGAUUUUGA    | 17:55273416-55273437[+]                                                   |
| hsa-miR-92b   | UAUUGCACUCGUCCCGGCCUC     | 1:153431652-153431672[+]                                                  |
| hsa-miR-26a   | UUCAAGUAAUCCAGGAUAGGC     | 12:56504709-56504729[-],3:37985908-37985928[+]                            |
| hsa-miR-15b   | UAGCAGCACAUCAUGGUUUACA    | 3:161605089-161605110[+]                                                  |
| hsa-miR-513   | UUCACAGGAGGUGUCAUUUUAU    | X:146115106-146115127[-],X:146102744-146102765[-]                         |
| hsa-miR-19b   | UGUGCAAAUCCAUGCAAAACUGA   | 13:90801500-90801522[+],X:133131379-33131401[-]                           |
| hsa-miR-130a  | CAGUGCAAUGUUAAAAGGGCAU    | 11:57165301-57165322[+]                                                   |
| hsa-miR-200c  | UAAUACUGCCGGGUAAUGAUGG    | 12:6943166-6943187[+]                                                     |
| hsa-miR-93    | AAAUGGCUUGUUCGUGCAGGUAG   | 7:99529374-99529395[-]                                                    |
| hsa-miR-612   | GCUGGGCAGGGCUUCUGAGCUCCUU | 11:64968520-64968544[+],1:11628980-11629002[+],11:194222463-19422482[-]   |
| hsa-miR-16    | UAGCAGCACGUAAAUAUUGGCG    | 3:161605236-161605257[+],13:49521164-49521185[-]                          |
| hsa-miR-103   | AGCAGCAUUGUACAGGGCUAUGA   | 20:3846188-3846210[+],5:167920487-167920509[-],10:91342495-91342515[-]    |
| hsa-miR-107   | AGCAGCAUUGUACAGGGCUAUCA   | 10:91342493-91342515[-],20:3846188-3846210[+],5:167920489-167920509[-]    |
| hsa-miR-221   | AGCUACAUUGUCUGCGGGUUUC    | X:45490552-45490574[-]                                                    |
| hsa-miR-363   | AAUUGCACGGUAUCCAUCUGUA    | X:133131078-133131099[-]                                                  |
| hsa-miR-575   | GAGCCAGUUGGACAGGAGC       | #4:83893529-83893547[-]                                                   |
| hsa-miR-373   | GAAGUGCUUCGAUUUUGGGUGU    | 19:58983813-58983836[+]                                                   |
| hsa-miR-342   | UCUCACACAGAAUUCGCACCCGUC  | 14:99645805-99645828[+]                                                   |
| hsa-miR-191   | CAACGGAAUCCCAAAGCAGCU     | *3:49033109-49033131[-]                                                   |
| hsa-miR-302c* | UUUAACAUGGGGUACCUGCUG     | 4:113789007-113789028[-]                                                  |
| hsa-miR-130b  | CAGUGCAAUGAUGAAAGGGCAU    | 22:20337643-20337664[+]                                                   |
| hsa-miR-494   | UGAAACAUAACGGGAAACCUCUU   | 14:100565771-100565794[+]                                                 |
| hsa-miR-106b  | UAAAGUGCUGACAGUGCAGAU     | 7:99529602-99529622[-]                                                    |
| hsa-miR-320   | AAAAGCUGGGUUGAGAGGGCGAA   | *8:22158431-22158454[-],1:222511372-222511395[-],1:117015931-117015954[+] |
| hsa-miR-30c   | UGUAAACAUCCUACACUCUCAGC   | 1:40995559-40995581[+],6:72143427-72143449[-]                             |
| hsa-miR-594   | CCCAUCUGGGGUGGCCUGUGACUUU | 7:138676046-138676070[+]                                                  |
| hsa-miR-200b  | UAAUACUGCCUGGUAAUGAUGAC   | 1:1092403-1092425[+]                                                      |
| hsa-miR-26b   | UUCAAGUAAUUCAGGAUAGGUU    | 2:218975624-218975645[+]                                                  |
| hsa-miR-182   | UUUGGCAAUGGUAGAACUCACA    | 7:129197525-129197546[-]                                                  |
| hsa-miR-374   | UUUAUAUACAACCUGAUAAAGUG   | X:73423885-73423906[-]                                                    |
| hsa-miR-30b   | UGUAAACAUCCUACACUCAGCU    | 8:135881995-135882016[-]                                                  |
| hsa-miR-222   | AGCUACAUCUGGCUACUGGGUCUC  | X:45491383-45491406[-]                                                    |
| hsa-miR-148a  | UCAGUGCACUACAGAACUUUGU    | 7:25956067-25956088[-]                                                    |
| hsa-miR-361   | UUUAUCAGAAUCUCCAGGGUAC    | X:65045342-85045363[-]                                                    |
| hsa-miR-367   | AAUUGCACUUAGCAAUGGUGA     | 4:113788482-113788503[-],X:137749831-137749850[+]                         |
| hsa-miR-18a   | UAAGGUGCAUCUAGUGCAGAU     | 13:90801011-90801032[+]                                                   |

Table S1

|                |                           |                                                                                                                                                     |
|----------------|---------------------------|-----------------------------------------------------------------------------------------------------------------------------------------------------|
| hsa-miR-517a   | AUCGUGCAUCCCUUUAGAGUGUU   | 19:58907387-58907409[+],19:58916184-58916206[+]                                                                                                     |
| hsa-miR-195    | UAGCAGCACAGAAAUUUGGC      | 17:6861710-6861730[-]                                                                                                                               |
| hsa-miR-637    | ACUGGGGGCUUUCGGGCUCUGCGU  | 19:3912427-3912450[-]                                                                                                                               |
| hsa-miR-371    | GUGCCGCCAUCUUUAGAGUGU     | 19:58982784-58982804[+]                                                                                                                             |
| hsa-miR-183    | UAUGGCACUGGUAGAAUUCACUG   | 7:129202042-129202064[-]                                                                                                                            |
| hsa-miR-421    | AUCAACAGACAUAUUAUUGGGCGC  | X:73354952-73354974[-]                                                                                                                              |
| hsa-miR-517b   | UCGUGCAUCCCUUUAGAGUGUU    | 19:58907388-58907409[+],19:58916185-58916206[+]                                                                                                     |
| hsa-miR-23b    | AUCACAUUGCCAGGGAUUACC     | 9:96887368-96887388[+]                                                                                                                              |
| hsa-miR-498    | UUUCAAGCCAGGGGGCGUUUUUC   | 19:58869296-58869318[+]                                                                                                                             |
| hsa-miR-526a   | CUCUAGAGGGAAGCACUUUCU     | 19:58895096-58895116[+],19:58901332-58901352[+],19:58902534-58902554[+],<br>19:58921994-58922014[+],19:58929958-58929978[+]                         |
| hsa-miR-23a    | AUCACAUUGCCAGGGAUUUCC     | 19:13808409-13808429[-]                                                                                                                             |
| hsa-miR-372    | AAAGUGCUGCGACAUUUGAGCGU   | 19:58982997-58983019[+]                                                                                                                             |
| hsa-miR-602    | GACACGGGCGACAGCUCGCGCCC   | *9:139852707-139852729[+]                                                                                                                           |
| hsa-miR-18b    | UAAGGUGCAUCUAGUGCAGUUA    | X:133131781-133131802[-]                                                                                                                            |
| hsa-miR-517*   | CCUCUAGAUGGAAGCACUGUCU    | 19:58907348-58907369[+],19:58916147-58916168[+],19:58936398-58936419[+]                                                                             |
| hsa-miR-302b*  | ACUUUAACAUGGAAGUCUUUCU    | 4:113789130-113789152[-]                                                                                                                            |
| hsa-miR-335    | UCAAGAGCAAUAACGAAAAAUGU   | 7:129923203-129923225[+]                                                                                                                            |
| hsa-miR-129    | CUUUUUGCGGUCUGGGCUUGC     | 7:127635165-127635185[+],11:43559534-43559554[+]                                                                                                    |
| hsa-miR-19a    | UGUGCAAUUCUAUGCAAAACUGA   | 13:90801194-90801216[+]                                                                                                                             |
| hsa-miR-518c*  | CAAAGCGCUCUCUUUAGAGUG     | 19:58903862-58903883[+]                                                                                                                             |
| hsa-miR-524*   | CUACAAAGGGAAGCACUUUCUC    | 19:58906083-58906104[+]                                                                                                                             |
| hsa-miR-516-5p | CAUCUGGAGGUAAGAAGCACUUU   | 19:58920522-58920544[+],19:58931925-58931947[+]                                                                                                     |
| hsa-miR-185    | UGGAGAGAAAGGAGUUUC        | 22:18400676-18400693[+] E=0.098                                                                                                                     |
| hsa-miR-658    | GGCGGAGGGAAGUAGGUCCGUUGGU | 22:36570240-36570264[-]                                                                                                                             |
| hsa-miR-425-5p | AAUGACACGAUCACUCCCGUUGA   | 3:49032636-49032658[-]                                                                                                                              |
| hsa-miR-125a   | UCCUCUGAGACCCUUUAACCGUG   | 19:56888333-56888355[+]                                                                                                                             |
| hsa-miR-128b   | UCACAGUGAACCGGUCUCUUUC    | 3:35761023-35761044[+],2:136139486-136139506[+]                                                                                                     |
| hsa-miR-128a   | UCACAGUGAACCGGUCUCUUUU    | 2:136139486-136139507[+],3:35761023-35761043[+]                                                                                                     |
| hsa-miR-29a    | UAGCACCAUCUGAAAUCGGUU     | 7:130212048-130212068[-]                                                                                                                            |
| hsa-miR-198    | GGUCCAGAGGGGAGAUAGG       | 3:1215597243-121597261[-]                                                                                                                           |
| hsa-miR-422b   | CUGGACUUGGAGUCAGAAGGCC    | 5:149092624-149092645[+],3:32002802-32002823[-],11:120022935-120022956[-]                                                                           |
| hsa-miR-151    | ACUAGACUGAAGCUCCUUGAGG    | 8:141811868-141811889[-],7:150838585-150838606[-],17:17715008-17715028[+]                                                                           |
| hsa-miR-148b   | UCAGUGCAUCACAGAAUUUGU     | 12:53017329-53017350[+]                                                                                                                             |
| hsa-miR-28     | AAGGAGCUCACAGUCUAUUGAG    | 3:189889276-189889297[+],8:131558554-131558573[+],8:119421382-119421401[-]                                                                          |
| hsa-miR-518f*  | CUCUAGAGGGAAGCACUUUCUCU   | 19:58895096-58895118[+],19:58901332-58901352[+],19:58902534-58902554[+],<br>19:58921994-58922014[+],19:58929958-58929978[+]                         |
| hsa-miR-30d    | UGUAAACAUCCCGCAGUGGAAG    | 8:135886344-135886365[-]                                                                                                                            |
| hsa-miR-126    | UCGUACCGUGAGUAAUAAUGC     | 9:138684926-138684946[+]                                                                                                                            |
| hsa-miR-27b    | UUCACAGUGGCUAAGUUCUGC     | 9:96887608-96887628[+]                                                                                                                              |
| hsa-miR-24     | UGGCUCAGUUCAGCAGGAACAG    | 9:96888167-96888188[+],19:13808103-13808124[-]                                                                                                      |
| hsa-miR-187    | UCGUGUCUUGUGUUGCAGCCG     | 18:31738797-31738817[-]                                                                                                                             |
| hsa-miR-512-3p | AAGUGCUGUCAUAGCUGAGGUC    | 19:58861795-58861816[+],19:58864279-58864300[+]                                                                                                     |
| hsa-miR-492    | AGGACCUGCGGGACAAGAUUCUU   | 12:93752334-93752356[+],12:9171765-9171785[+]                                                                                                       |
| hsa-miR-526b   | CUCUUGAGGGAAGCACUUUCUGUU  | 19:58889472-58889495[+],19:58901332-58901355[+],19:58902534-58902557[+],<br>19:58903825-58903848[+],19:58921994-58922017[+],19:58929958-58929981[+] |
| hsa-miR-650    | AGGAGGCAGCGCUCUCAGGAC     | *22:21495284-21495305[+],22:21431199-21431220[+]                                                                                                    |
| hsa-miR-101    | UACAGUACUGUGAUAAUCUGAAG   | 1:65296712-65296733[-],9:4840345-4840366[+]                                                                                                         |
| hsa-miR-564    | AGGCACGGUGUCAGCAGGC       | #3:44878399-44878417[+]                                                                                                                             |
| hsa-miR-574    | CACGCUCAUGCACACACCCAC     | *4:38546108-38546128[+]                                                                                                                             |
| hsa-miR-520h   | ACAAAGUGCUUCCCUUUAGAGU    | 19:58917286-58917307[+],19:58937632-58937653[+]                                                                                                     |
| hsa-miR-520g   | ACAAAGUGCUUCCCUUUAGAGUGU  | 19:58917286-58917309[+],19:58937632-58937653[+]                                                                                                     |

Table S1

|                |                           |                                                                                                |
|----------------|---------------------------|------------------------------------------------------------------------------------------------|
| hsa-miR-30a-5p | UGUAAACAUCCUCGACUGGAAG    | 6:72170019-72170040[-]                                                                         |
| hsa-miR-193b   | AACUGGCCCUCAAAGUCCCGUUU   | 16:14305374-14305398[+]                                                                        |
| hsa-miR-301    | CAGUGCAAUAGUAUUGUCAAAGC   | 17:54583292-54583314[-]                                                                        |
| hsa-miR-565    | GGCUGGCUCGCGAUGUCUGUUU    | 3:45705483-45705504[-]                                                                         |
| hsa-miR-7      | UGGAAGACUAGUGAUUUUGUUG    | 19:4721712-4721733[+],15:86956091-86956112[+],9:85774548-85774569[-]                           |
| hsa-miR-135a   | UAUGGCUUUUUAUCCUAUGUGA    | 3:52303326-52303348[-],12:96481743-96481765[+]                                                 |
| hsa-miR-422a   | CUGGACUUAGGGUCAGAAGGCC    | 15:61950240-61950261[-]                                                                        |
| hsa-miR-99b    | CACCCGUAGAACCGACCUUGCG    | *19:56887683-56887704[+]                                                                       |
| hsa-miR-206    | UGGA AUGUAAGGAAGUGUGUGG   | 6:52117158-52117179[+]                                                                         |
| hsa-miR-365    | UAAUGCCCUAAAAUCCUUAAU     | 16:14310698-14310719[+],17:26926610-26926631[+]                                                |
| hsa-miR-572    | GUCCGCUCGGCGGUGGCCCA      | 4:10979609-10979628[+],16:2257803-2257822[-]                                                   |
| hsa-miR-505    | GUCAACACUUGCUGGUUCCUC     | X:138833984-138834005[-]                                                                       |
| hsa-miR-146b   | UGAGAACUGAAUCCAUAGGCU     | 10:104186267-104186288[+]                                                                      |
| hsa-miR-517c   | AUCGUGCAUCCUUUAGAGUGU     | 19:58936435-58936456[+]                                                                        |
| hsa-miR-124a   | UUAAGGCACGCGGUGAAUGCCA    | 20:61280348-61280369[+],8:65454320-65454341[+],8:9798320-9798341[-]                            |
| hsa-miR-27a    | UUCACAGUGGCUAAGUCCGC      | 19:13808261-13808281[-]                                                                        |
| hsa-miR-519d   | CAAAGUGCCUCCCUUAGAGUGU    | 19:58908466-58908488[+]                                                                        |
| hsa-miR-324-3p | CCACUGCCCCAGGUGCUGCUGG    | 17:7067351-7067372[-]                                                                          |
| hsa-miR-210    | CUGUGCGUGUGACAGCGGCUGA    | 11:558112-558133[-]                                                                            |
| hsa-miR-373*   | ACUCAAAAUGGGGGCGUUUCC     | 19:58983776-58983797[+]                                                                        |
| hsa-miR-497    | CAGCAGCACACUGUGGUUUGU     | 17:6862022-6862042[-]                                                                          |
| hsa-miR-636    | UGUGCUUGCUCGUCCCGCCGCAG   | 17:72244142-72244165[-]                                                                        |
| hsa-miR-484    | UCAGGCUCAGUCCCCUCCGAU     | 16:15644659-15644680[+]                                                                        |
| hsa-miR-205    | UCCUUCAUUCCACCGGAGUCUG    | 1:207672134-207672155[+]                                                                       |
| hsa-miR-296    | AGGGCCCCCCCUCAAUCCUGU     | 20:56826111-56826131[-]                                                                        |
| hsa-miR-186    | CAAAGAAUUCUCCUUUUGGGCUU   | 1:71305951-71305973[-]                                                                         |
| hsa-miR-519c   | AAAGUGCAUCUUUUUAGAGGAU    | 19:58881588-58881609[+]                                                                        |
| hsa-miR-30e-3p | CUUUCAGUCGGAUGUUACAGC     | 1:40992672-40992693[+]                                                                         |
| hsa-miR-15a    | UAGCAGCACAAUAGGUUUGUG     | 13:49521304-49521325[-],7:3516341-3516360[-]                                                   |
| hsa-miR-214    | ACAGCAGGCACAGACAGGCAG     | 1:170374580-170374600[-]                                                                       |
| hsa-miR-192    | CUGACCUAUGAAUUGACAGCC     | 11:64415251-64415271[-]                                                                        |
| hsa-miR-331    | GCCCCUGGGCCUAUCCUAGAA     | 12:94226387-94226407[+]                                                                        |
| hsa-miR-223    | UGUCAGUUUGUCAAAUACCCC     | X:65155504-65155524[+]                                                                         |
| hsa-miR-34a    | UGGCAGUGUCUUAGCUGGUUGUU   | 1:9134380-9134402[-]                                                                           |
| hsa-miR-197    | UUCACCAUCCUUCUCCACCCAGC   | 1:109943085-109943106[+]                                                                       |
| hsa-miR-520d   | AAAGUGCUUCUCUUUGGUGGGUU   | 19:58915215-58915237[+]                                                                        |
| hsa-miR-601    | UGGUCUAGGAUUGUUGGAGGAG    | 9:125204667-125204688[-]                                                                       |
| hsa-miR-598    | UACGUCAUCGUUGUCAUCGUGA    | 8:10930141-10930162[-]                                                                         |
| hsa-miR-191*   | GCUGCGCUUGGAUUUCGUCCCC    | 3:49033068-49033089[-]                                                                         |
| hsa-miR-515-5p | UUCUCCAAAAGAAAGCACUUUCUG  | 19:58874082-58874105[+],19:58880088-58880111[+]                                                |
| hsa-miR-557    | GUUUGCACGGGUGGGCCUUGUCU   | 1:166611446-166611468[+]                                                                       |
| hsa-miR-520c   | AAAGUGCUUCCUUUAGAGGGUU    | 19:58896333-58896355[+],19:58902572-58902594[+],19:58877279-58877300[+],19:58889510-5888952[+] |
| hsa-miR-149    | UCUGGCUCCGUGUCUUCACUCC    | 2:241044105-241044126[+]                                                                       |
| hsa-miR-489    | AGUGACAUCAUAUACGGCAGC     | 7:92951195-92951217[-]                                                                         |
| hsa-miR-31     | GGCAAGAUGCUGGCAUAGCUG     | 9:21502156-21502176[-]                                                                         |
| hsa-miR-525    | CUCCAGAGGGAUGCACUUUCU     | 19:58892613-58892633[+]                                                                        |
| hsa-miR-18a*   | ACUGCCCUAAGUGCUCUUCU      | 13:90801052-90801072[+]                                                                        |
| hsa-miR-519e*  | AAAGUGCCUCCUUUAGAGUGU     | 19:58875056-58875077[+]                                                                        |
| hsa-miR-520f   | AAGUGCUUCCUUUAGAGGGUU     | 19:58877279-58877300[+],19:58896334-58896355[+],19:58902573-58902594[+]                        |
| hsa-miR-593    | AGGCACCAGCCAGGCAUUGCUCAGC | *7:127509163-127509188[+]                                                                      |
| hsa-miR-125b   | UCCUUGAGACCCUAACUUGUGA    | 21:16884444-16884465[+],11:121475727-121475748[-]                                              |

Table S1

|                |                           |                                                                                                                                                                                                                                 |
|----------------|---------------------------|---------------------------------------------------------------------------------------------------------------------------------------------------------------------------------------------------------------------------------|
| hsa-miR-204    | UUCCCUUUGUCAUCCUAUGCCU    | 9:72614767-72614788[-]                                                                                                                                                                                                          |
| hsa-miR-623    | AUCCCUUGCAGGGGUGUUGGGU    | 13:98806401-98806423[+]                                                                                                                                                                                                         |
| hsa-miR-519b   | AAAGUGCAUCCUUUUAGAGGUUU   | 19:58890329-58890351[+]                                                                                                                                                                                                         |
| hsa-miR-628    | UCUAGUAAGAGUGGCAGUCG      | 15:53452445-53452464[-]                                                                                                                                                                                                         |
| hsa-miR-22     | AAGCUGCCAGUUGAAGAACUGU    | 17:1563958-1563979[-]                                                                                                                                                                                                           |
| hsa-miR-194    | UGUAACAGCAACUCCAUUGUGGA   | 11:64415452-64415473[-],1:218358171-218358192[-]                                                                                                                                                                                |
| hsa-miR-199a*  | UACAGUAGUCUGCACAUUGGUU    | 19:10789106-10789121[-],1:170380318-170380339[-],9:130046846-130046867[-]                                                                                                                                                       |
| hsa-miR-340    | UCCGUCUCAGUUACUUUAUAGCC   | 5:179374924-179374946[-]                                                                                                                                                                                                        |
| hsa-miR-520a*  | AAAGUGCUUCCCUUUGGACUGU    | 19:5885999-58886020[+]                                                                                                                                                                                                          |
| hsa-miR-615    | UCCGAGCCUGGGUCUCCUCU      | 12:52714061-52714081[+]                                                                                                                                                                                                         |
| hsa-miR-200a   | UAACACUGUCUGGUAACGAUGU    | 1:1093159-1093180[+]                                                                                                                                                                                                            |
| hsa-miR-155    | UUAAGUCUAAUCGUGAUAGGGG    | 21:25868166-25868187[+]                                                                                                                                                                                                         |
| hsa-miR-660    | UACCAUUGCAUUAUCGAGUUG     | X:49664604-49664625[+]                                                                                                                                                                                                          |
| hsa-miR-181b   | AACAUAUCAUUGCUGUCGGUGGG   | 9:126495825-126495846[+],1:197094678-197094699[-]                                                                                                                                                                               |
| hsa-miR-518b   | CAAAGCGCUCUUUUAGAGGU      | 19:58897853-58897874[+]                                                                                                                                                                                                         |
| hsa-miR-532    | CAUGCCUUGAGUGUAGGACCGU    | X:49654513-49654534[+]                                                                                                                                                                                                          |
| hsa-miR-30e-5p | UGUAAACAUCUUGACUGGA       | 1:40992630-40992649[+]                                                                                                                                                                                                          |
| hsa-miR-560    | GCGUGCGCCGCCCGGCCGCC      | *2:132731985-132732005[-],20:26137832-26137852[-],Y:10643119-10643139[+]                                                                                                                                                        |
| hsa-miR-362    | AAUCCUUGGAACCUAGGUGUGAGU  | X:49660316-49660339[+]                                                                                                                                                                                                          |
| hsa-miR-425-3p | AUCGGGAUUGUCGUGUCCGCC     | 3:49032597-49032617[-]                                                                                                                                                                                                          |
| hsa-miR-9*     | UAAAGCUAGAUAAACCGAAAGU    | 1:154656770-154656790[-],15:87712307-87712327[+]-,5:87998440-87998460[-]                                                                                                                                                        |
| hsa-miR-625    | AGGGGGAAGUUCUAUAGUCCU     | 14:65007587-65007608[+],14:65007622-65007643[-]                                                                                                                                                                                 |
| hsa-miR-518f   | AAAGCGCUUCUUUAGAGGA       | 19:58895134-58895154[+]                                                                                                                                                                                                         |
| hsa-miR-429    | UAAUACUGUCUGGUAACCGU      | 1:1094298-1094319[+]                                                                                                                                                                                                            |
| hsa-miR-141    | UAACACUGUCUGGUAAGAUGG     | 12:6943579-6943600[+]                                                                                                                                                                                                           |
| hsa-miR-345    | UGCUGACUCCUAGUCCAGGGC     | 14:99843965-99843985[+]                                                                                                                                                                                                         |
| hsa-miR-424    | CAGCAGCAAUUCUUGUUUGAA     | X:133508376-133508397[-]                                                                                                                                                                                                        |
| hsa-miR-150    | UCUCCCAACCCUUGUACCAGUG    | 19:54695901-54695922[-]                                                                                                                                                                                                         |
| hsa-miR-522    | AAAUGGUUCCCUUAGAGUGUU     | 19:58946330-58946352[+]                                                                                                                                                                                                         |
| hsa-miR-224    | CAAGUCACUAGUGGUUCCGUUUA   | X:150877757-150877779[-]                                                                                                                                                                                                        |
| hsa-miR-520b   | AAAGUGCUUCCUUUAGAGGG      | 19:58896333-58896353[+],19:58902572-58902592[+],19:58877279-58877298[+],<br>19:58889510-58889529[+]                                                                                                                             |
| hsa-miR-9      | UCUUUGGUUAUCUAGCUGUAUGA   | 1:154656808-154656830[-],15:87712267-87712289[+]-,5:87998476-87998498[-]                                                                                                                                                        |
| hsa-miR-202    | AGAGGUUAAGGGCAUGGGAAAA    | *10:134911030-134911052[-]                                                                                                                                                                                                      |
| hsa-miR-188    | CAUCCCUUGCAUGGUGGAGGGU    | X:49654863-49654884[+]                                                                                                                                                                                                          |
| hsa-miR-200a*  | CAUCUUAACCGACAGUGCUGGA    | 1:1093121-1093142[+]                                                                                                                                                                                                            |
| hsa-miR-518e   | AAAGCGCUUCCCUUCAGAGUGU    | 19:58924957-58924978[+]                                                                                                                                                                                                         |
| hsa-miR-142-5p | CAUAAAGUAGAAAGCACUAC      | 17:53763644-53763663[-]                                                                                                                                                                                                         |
| hsa-miR-423    | AGCUCGGUCUGAGGCCCCUCAG    | 17:25468275-25468296[+]                                                                                                                                                                                                         |
| hsa-miR-181a   | AACAUAACGCUUGUCGGUGAGU    | 9:126494580-126494602[+],1:197094860-197094882[-]                                                                                                                                                                               |
| hsa-miR-526c   | CUCUAGAGGGAAGCGCUUUCUGUU  | 19:58881550-58881573[+],19:58890291-58890314[+],19:58893466-58893489[+],<br>19:58924919-58924942[+],19:58946292-58946315[+],19:58947477-58947500[+],<br>19:58897820-58897839[+],19:58896295-58896318[+],19:58957425-58957448[+] |
| hsa-miR-17-3p  | ACUGCAGUGAAGGCACUUGU      | 13:90800910-90800929[+]                                                                                                                                                                                                         |
| hsa-miR-181d   | AACAUAUCAUUGUUGUCGGUGGGUU | 19:13846724-13846747[+]                                                                                                                                                                                                         |
| hsa-miR-563    | AGGUUGACAUACGUUUCCC       | 3:15890333-15890351[+], E=0.025                                                                                                                                                                                                 |
| hsa-miR-629    | GUUCUCCCAACGUAAGCCCAGC    | 15:68158780-68158801[-]                                                                                                                                                                                                         |
| hsa-miR-203    | GUGAAAUGUUUAGGACCACUAG    | 14:103653559-103653580[+]                                                                                                                                                                                                       |
| hsa-miR-589    | UCAGAACAAGUCCGGUUCCAGA    | 7:5501991-5502014[+]                                                                                                                                                                                                            |
| hsa-miR-452    | UGUUUGCAGAGGAAACUGAGAC    | X:150878803-150878824[-]                                                                                                                                                                                                        |
| hsa-miR-654    | UGGUGGGCCGCAGAACAUUGUC    | 14:100576324-100576345[+]                                                                                                                                                                                                       |
| hsa-miR-145    | GUCCAGUUUCCAGGAUCCCUU     | 5:148790417-148790440[+]                                                                                                                                                                                                        |

|                |                          |                                                                                                     |
|----------------|--------------------------|-----------------------------------------------------------------------------------------------------|
| hsa-miR-526b*  | AAAGUGCUUCCUUUUAGAGGC    | 19:58889510-58889530[+],19:58896333-58896352[+],19:58902572-58902591[+]                             |
| hsa-miR-324-5p | CGCAUCCCUAGGGCAUUGGUGU   | 17:7067385-7067407[-]                                                                               |
| hsa-miR-146a   | UGAGAACUGAAUUCUAGGGUU    | 5:159844957-159844978[+]                                                                            |
| hsa-miR-652    | AAUGGCGCCACUAGGGUUGUGCA  | X:109185273-109185295[+]                                                                            |
| hsa-miR-515-3p | GAGUGCCUUCUUUUGGAGCGU    | 19:58874119-58874139[+],19:58880125-58880145[+]                                                     |
| hsa-miR-519a   | AAAGUGCAUCCUUUUAGAGUGUAC | 19:58947515-58947539[+],19:58957463-58957487[+],19:58936438-58936459[+],<br>19:58875056-58875080[+] |
| hsa-miR-455    | UAUGUGCCUUGGACUACAUCG    | 9:116011550-116011571[+]                                                                            |
| hsa-miR-105    | UCAAAUGCUCAGACUCCUGU     | X:151313589-151313608[-],X:151311396-151311415[-]                                                   |
| hsa-miR-143    | UGAGAUGAAGCACUGUAGCUCU   | 5:148788734-148788755[+]                                                                            |
| hsa-miR-486    | UCCUGUACUGAGCUGCCCCGAG   | 8:41637119-41637140[+],8:41637159-41637180[-]                                                       |
| hsa-miR-542-5p | UCGGGGAUCAUCAUGUCACGAG   | X:133503097-133503118[-]                                                                            |
| hsa-miR-363*   | CGGGUGGAUCACGAUGCAAUUU   | X:133131121-133131142[-]                                                                            |
| hsa-miR-132    | UAAACAGUCUACAGCCAUGGUCG  | 17:1899973-1899994[-]                                                                               |
| hsa-miR-152    | UCAGUGCAUGACAGAACUUGGG   | 17:43469538-43469559[-]                                                                             |
| hsa-miR-500    | AUGCACCUGGGCAAGGAUUCUG   | X:49659830-49659851[+],X:49665998-49666017[+]                                                       |
| hsa-miR-122a   | UGGAGUGUGACAAUGGUGUUUGU  | 18:54269300-54269322[+],10:29373153-29373172[+]                                                     |
| hsa-miR-659    | CUUGGUUCAGGGAGGGUCCCCA   | 22:36573646-36573667[-]                                                                             |
| hsa-miR-451    | AAACCGUUACCAUUAUCUGAGUUU | 17:24212546-24212568[-]                                                                             |
| hsa-miR-30a-3p | CUUUCAGUCGGAUGUUUUGCAGC  | 6:72169978-72169999[-]                                                                              |
| hsa-miR-590    | GAGCUUAUUAUAAAAGUGCAG    | 7:73243479-73243500[+],9:11744034-11744053[+]                                                       |
| hsa-miR-346    | UGUCUGCCCGCAUGCCUGCCUCU  | 10:88014484-88014506[-]                                                                             |
| hsa-miR-512-5p | CACUCAGCCUUGAGGGCACUUUC  | 19:58861758-58861780[+],19:58864242-58864264[+]                                                     |
| hsa-miR-641    | AAAGACAUAGGAUAGAGUCACCUC | 19:45480350-45480373[-]                                                                             |
| hsa-miR-330    | GCAAAGCACACGGCCUGCAGAGA  | *19:50834107-50834129[-],2:31150573-31150594[+]                                                     |
| hsa-miR-502    | AUCCUUGCUAUCUGGGUGCUA    | X:49665961-49665981[+]                                                                              |
| hsa-miR-96     | UUUGGCACUAGCACAUUUUUGC   | 7:129201816-129201837[-]                                                                            |
| hsa-miR-634    | AACCAGCACCCCAACUUUGGAC   | *17:62213712-62213733[+]                                                                            |
| hsa-miR-215    | AUGACCUAUGAAUUGACAGAC    | 1:218357881-218357901[-]                                                                            |
| hsa-miR-133b   | UUGGUCCCCUUAACACAGCUA    | 6:52121746-52121766[+],20:60572623-60572642[+],18:17659672-17659691[-]                              |
| hsa-miR-501    | AAUCCUUUGUCCUGGGUGAGA    | X:49661083-49661104[+]                                                                              |
| hsa-miR-550    | UGUCUUACUCCUCAGGCACAU    | 7:30295995-30296016[+],7:32739178-32739199[+],7:29686889-29686910[-]                                |
| hsa-miR-519e   | AAAGUGCCUCCUUUUAGAGUGU   | 19:58875056-58875077[+]                                                                             |
| hsa-miR-218    | UUGUGCUUGAUCUAACCAUGU    | 5:168127794-168127814[-],4:20139020-20139040[+]                                                     |
| hsa-miR-212    | UAACAGUCUCCAGUCACGGCC    | 17:1900334-1900354[-]                                                                               |
| hsa-miR-133a   | UUGGUCCCCUUAACACAGCUGU   | 20:60572623-60572644[+],18:17659670-17659691[-],6:52121746-52121765[+]                              |
| hsa-miR-503    | UAGCAGCGGGAACAGUUCUGCAG  | X:133508067-133508089[-]                                                                            |
| hsa-miR-378    | CUCCUGACUCCAGGUCCUGUGU   | 5:149092585-149092606[+]                                                                            |
| hsa-miR-382    | GAAGUUGUUCGUGGUGGAUUCG   | 14:100590406-100590427[+]                                                                           |
| hsa-miR-520e   | AAAGUGCUUCCUUUUUGAGGG    | 19:58870830-58870850[+]                                                                             |
| hsa-miR-592    | UUGUGCAAUAUGCGAUGAUGU    | 7:126485438-126485459[-]                                                                            |
| hsa-miR-631    | AGACCUGGCCAGACCCUCAGC    | *15:73433044-73433064[-]                                                                            |
| hsa-miR-527    | CUGCAAAGGGAAGCCCUUUCU    | 19:58926085-58926105[+],19:58934414-58934434[+],19:58949097-58949117[+]                             |
| hsa-miR-450    | UUUUUGCGAUGUGUUCUAAUA    | X:133502261-133502282[+],X:133502090-133502111[+]                                                   |
| hsa-miR-127    | UCGGAUCCGUCUGAGCUUGGCU   | 14:100419125-100419146[+]                                                                           |
| hsa-miR-495    | AAACAAACAUGGUGCACUUCUUU  | 14:100569894-100569916[+]                                                                           |
| hsa-miR-100    | AACCCGUAGAUCGGAACUUGUG   | 11:121528193-121528214[-]                                                                           |
| hsa-miR-584    | UAUUGGUUUGCCUGGGACUGAG   | 5:148422129-148422150[-],4:40667603-40667622[-]                                                     |
| hsa-miR-409-3p | CGAAUGUUUGCUCGGUGAACCCCU | 14:100601435-100601457[+]                                                                           |
| hsa-miR-504    | AGACCCUGGUCUGCACUCUAU    | X:137577588-137577608[-]                                                                            |
| hsa-miR-647    | GUGGCUGCACUCACUCCUUC     | 20:62044488-62044508[-],10:50531618-50531637[-]                                                     |
| hsa-miR-328    | CUGGCCUCUCUGCCCUUCCGU    | 16:65793731-65793752[-]                                                                             |

Table S1

|               |                           |                                                                                              |
|---------------|---------------------------|----------------------------------------------------------------------------------------------|
| hsa-miR-29c   | UAGCACCAUUGAAAUCGGU       | 1:206041835-206041854[-]                                                                     |
| hsa-miR-617   | AGACUUCCCAUUUGAAGGUGGC    | 12:79750503-79750524[-]                                                                      |
| hsa-miR-370   | GCCUGCUGGGGUGGAACCUGG     | 14:100447276-100447296[+]                                                                    |
| hsa-miR-624   | UAGUACCAGUACCUUGUGUUCA    | 14:30553663-30553684[-]                                                                      |
| hsa-miR-524   | GAAGGCGCUUCCCUUUGGAGU     | 19:58906120-58906140[+]                                                                      |
| hsa-miR-608   | AGGGGUGGUGUUGGGACAGCUCCGU | 10:102724747-102724771[+]                                                                    |
| hsa-miR-520d* | UCUACAAAGGGAAGCCCUUUCUG   | 19:58915176-58915198[+]                                                                      |
| hsa-miR-453   | GAGGUUGUCCGUGGUGAGUUCG    | 14:100592322-100592343[+]                                                                    |
| hsa-miR-510   | UACUCAGGAGAGUGGCAAUCACA   | X:146161587-146161609[-]                                                                     |
| hsa-miR-551b  | GCGACCCAUACUUGGUUUCAG     | 3:169752396-169752416[+]                                                                     |
| hsa-miR-199a  | CCCAGUGUUCAGACUACCUGUUC   | 19:10789145-10789167[-],1:170380355-170380377[-]                                             |
| hsa-miR-622   | ACAGUCUGCUGAGGUUGGAGC     | 13:89681497-89681517[+],12:51631811-51631831[+]                                              |
| hsa-miR-339   | UCCUGUCCUCCAGGAGCUCA      | 20:559417-559437[-],22:31074124-31074144[-],7:1029154-1029174[-],<br>22:30854337-30854356[+] |
| hsa-miR-448   | UUGCAUUGUAGGAUGUCCCAU     | X:113964343-113964364[+]                                                                     |
| hsa-miR-483   | UCACUCCUCUCCUCCGUCUUCU    | 11:2111946-2111968[-],8:58828779-58828800[-]                                                 |
| hsa-miR-596   | AAGCCUGCCCGGUCCUCGGG      | *8:1752819-1752839[+]                                                                        |
| hsa-miR-431   | UGUCUUGCAGGCCGCAUGCA      | 14:100417116-100417136[+]                                                                    |
| hsa-miR-211   | UUCCCUUUGUCAUCCUUCGCCU    | 15:29144590-29144611[-]                                                                      |
| hsa-miR-491   | AGUGGGAACCCUCCAUAGAGGA    | 9:20706119-20706141[+]                                                                       |
| hsa-let-7a    | UGAGGUAGUAGGUUGUAUAGUU    | 22:44887296-44887317[+],9:95978065-95978086[+],11:121522486-121522507[-]                     |
| hsa-let-7f    | UGAGGUAGUAGAUUGUAUAGUU    | X:53600932-53600953[-],9:95978456-95978477[+]                                                |
| hsa-let-7e    | UGAGGUAGGAGGUUGUAUAGU     | 19:56887858-56887878[+]                                                                      |
| hsa-let-7b    | UGAGGUAGUAGGUUGUGUGGUU    | 22:44888235-44888256[+],5:142470242-142470261[+]                                             |
| hsa-let-7i    | UGAGGUAGUAGUUUGUGCUGU     | 12:61283738-61283758[+]                                                                      |
| hsa-let-7c    | UGAGGUAGUAGGUUGUAUGGUU    | 21:16834029-16834050[+]                                                                      |
| hsa-let-7d    | AGAGGUAGUAGGUUGCAUAGU     | 9:95980944-95980964[+]                                                                       |
| hsa-let-7g    | UGAGGUAGUAGUUUGUACAGU     | 3:52277393-52277413[-]                                                                       |
