# Supplementary material
Source: publisher figshare collection journal article supplement (https://plos.figshare.com/articles/dataset/_/150158)
Supplement: Supplementary file [file 1]

Table S2

| miRNA         | Sequence                  | 4 species | rhesus | chimpanzee |
|---------------|---------------------------|-----------|--------|------------|
| hsa-miR-638   | AGGGAUCGCGGGCGGUGGCGGCCU  | NC        | C      | NC         |
| hsa-miR-302b  | UAAGUGCUUCCAUGUUUAGUAG    | C         | C      | C          |
| hsa-miR-302d  | UAAGUGCUUCCAUGUUUGAGUGU   | C         | C      | C          |
| hsa-miR-302a  | UAAGUGCUUCCAUGUUUUGGUGA   | NC        | C      | C          |
| hsa-miR-302a* | UAAACGUGGAUGUACUUGCUUU    | C         | C      | C          |
| hsa-miR-20a   | UAAAGUGCUUAUAGUGCAGGUAG   | C         | NC     | C          |
| hsa-miR-17-5p | CAAAGUGCUUACAGUGCAGGUAGU  | C         | C      | C          |
| hsa-miR-302c  | UAAGUGCUUCCAUGUUUCAGUGG   | C         | C      | C          |
| hsa-miR-663   | AGGCGGGGCGCCGCGGGACCGC    | NC        | NC     | C          |
| hsa-miR-20b   | CAAAGUGCUCAUAGUGCAGGUAG   | C         | C      | C          |
| hsa-miR-106a  | AAAAGUGCUUACAGUGCAGGUAGC  | C         | C      | C          |
| hsa-miR-25    | CAUUGCACUUGUCUCGGUCUGA    | C         | C      | NC         |
| hsa-miR-92    | UAUUGCACUUGUCCCGGCCUG     | C         | C      | C          |
| hsa-miR-21    | UAGCUUAUCAGACUGAUGUUGA    | C         | C      | C          |
| hsa-miR-92b   | UAUUGCACUCGUCCCGGCCUC     | C         | C      | NC         |
| hsa-miR-26a   | UUCAGUAAUCCAGGAUAGGC      | C         | C      | C          |
| hsa-miR-15b   | UAGCAGCACAUCAUGGUUUACA    | C         | C      | C          |
| hsa-miR-513   | UUCACAGGGAGGUGUCAUUUAU    | NC        | C      | C          |
| hsa-miR-19b   | UGUGCAAAUCCAUGCAAAACUGA   | C         | C      | C          |
| hsa-miR-130a  | CAGUGCAAUGUUAAAAGGGCAU    | C         | C      | C          |
| hsa-miR-200c  | UAAUACUGCCGGGUAAUGAUGG    | C         | C      | NC         |
| hsa-miR-93    | AAAGUGCUGUUCGUGCAGGUAG    | C         | C      | C          |
| hsa-miR-612   | GCUGGGCAGGGCUUCUGAGCUCCUU | NC        | NC     | C          |
| hsa-miR-16    | UAGCAGCACGUAAAUUUGGCG     | C         | C      | C          |
| hsa-miR-103   | AGCAGCAUUGUACAGGGCUAUGA   | C         | C      | C          |
| hsa-miR-107   | AGCAGCAUUGUACAGGGCUAUC    | C         | C      | C          |
| hsa-miR-221   | AGCUACAUGUCUGCUGGGUUUC    | C         | C      | C          |
| hsa-miR-363   | AAUUGCACGGUAUCCAUCUGUA    | C         | C      | NC         |
| hsa-miR-575   | GAGCCAGUUGGACAGGAGC       | NC        | NC     | C          |
| hsa-miR-373   | GAAGUGCUUCGAUUUUGGGGUGU   | NC        | C      | C          |
| hsa-miR-342   | UCUCACACAGAAUCGCACCCGUC   | C         | C      | C          |
| hsa-miR-191   | CAACGGAAUCCCAAAGCAGCU     | C         | C      | C          |
| hsa-miR-302c* | UUUAACAUGGGGUACCUGCUG     | C         | C      | C          |
| hsa-miR-130b  | CAGUGCAAUGAUGAAAGGGCAU    | C         | C      | C          |
| hsa-miR-494   | UGAAACAUAACACGGGAAACCUCUU | C         | C      | C          |
| hsa-miR-106b  | UAAAGUGCUGACAGUGCAGAU     | C         | C      | C          |
| hsa-miR-320   | AAAAGCUGGGUUGAGAGGGCGAA   | C         | C      | C          |
| hsa-miR-30c   | UGUAAACAUCUACACUCUCAGC    | C         | C      | C          |
| hsa-miR-594   | CCCAUCUGGGGUGGCCUGUGACUUU | NC        | NC     | C          |
| hsa-miR-200b  | UAAUACUGCCUGGUAAUGAUGAC   | C         | NC     | NC         |
| hsa-miR-26b   | UUCAAGUAAUUCAGGAUAGGUU    | C         | C      | C          |
| hsa-miR-182   | UUUGGCAAUGGUAGAACUCACA    | C         | C      | C          |
| hsa-miR-374   | UUAUAAUACAACCUGAUAGUG     | C         | C      | C          |
| hsa-miR-30b   | UGUAAACAUCUACACUCAGCU     | C         | C      | C          |
| hsa-miR-222   | AGCUACAUCUGGCUACUGGGUCUC  | C         | C      | NC         |

|                |                          |    |    |    |
|----------------|--------------------------|----|----|----|
| hsa-miR-148a   | UCAGUGCACUACAGAACUUUGU   | C  | C  | C  |
| hsa-miR-361    | UUAUCAGAAUCUCCAGGGGUAC   | C  | C  | C  |
| hsa-miR-367    | AAUUGCACUUUAGCAAUGGUGA   | C  | C  | C  |
| hsa-miR-18a    | UAAGGUGCAUCUAGUGCAGAU    | C  | C  | C  |
| hsa-miR-517a   | AUCGUGCAUCCCUUAGAGUGUU   | NC | C  | C  |
| hsa-miR-195    | UAGCAGCACAGAAAUUUGGC     | C  | C  | C  |
| hsa-miR-637    | ACUGGGGGCUUUCGGGCUCUGCGU | NC | NC | C  |
| hsa-miR-371    | GUGCCGCCAUCUUUUGAGUGU    | NC | C  | C  |
| hsa-miR-183    | UAUGGCACUGGUAGAAUUCACUG  | C  | C  | C  |
| hsa-miR-421    | AUCAACAGACAUUAAUUGGGCGC  | C  | C  | NC |
| hsa-miR-517b   | UCGUGCAUCCCUUAGAGUGUU    | NC | C  | C  |
| hsa-miR-23b    | AUCACAUUGCCAGGGAUUACC    | C  | C  | C  |
| hsa-miR-498    | UUUCAAGCCAGGGGCGUUUUUC   | NC | C  | C  |
| hsa-miR-526a   | CUCUAGAGGGAAGCACUUUCU    | NC | C  | C  |
| hsa-miR-23a    | AUCACAUUGCCAGGGAUUUC     | C  | C  | C  |
| hsa-miR-372    | AAAGUGCUGCGACAUUUGAGCGU  | NC | C  | C  |
| hsa-miR-602    | GACACGGGCGACAGCUGCGGCC   | NC | NC | NC |
| hsa-miR-18b    | UAAGGUGCAUCUAGUGCAGUUA   | C  | C  | C  |
| hsa-miR-517*   | CCUCUAGAUGGAAGCACUGUCU   | NC | NC | NC |
| hsa-miR-302b*  | ACUUUAACAUGGAAGUGCUUUCU  | NC | C  | C  |
| hsa-miR-335    | UCAAGAGCAAUAACGAAAAUGU   | C  | C  | C  |
| hsa-miR-129    | CUUUUUGCGGUCUGGGCUUGC    | C  | C  | C  |
| hsa-miR-19a    | UGUGCAAAUCUAUGCAAAACUGA  | C  | NC | C  |
| hsa-miR-518c*  | CAAAGCGCUUCUCUUUAGAGUG   | NC | C  | C  |
| hsa-miR-524*   | CUACAAAGGAAGCACUUUCUC    | NC | C  | C  |
| hsa-miR-516-5p | CAUCUGGAGGUAAGAAGCACUUU  | NC | NC | C  |
| hsa-miR-185    | UGGAGAGAAAGGCAGUUC       | C  | C  | C  |
| hsa-miR-658    | GGCGGAGGGAAGUAGGUCGUGGU  | NC | NC | C  |
| hsa-miR-425-5p | AAUGACACGAUCACUCCGUUGA   | C  | C  | C  |
| hsa-miR-125a   | UCCUGAGACCCUUUAACUGUG    | C  | C  | C  |
| hsa-miR-128b   | UCACAGUGAACCGGUCUUUUC    | C  | C  | C  |
| hsa-miR-128a   | UCACAGUGAACCGGUCUUUUU    | C  | C  | C  |
| hsa-miR-29a    | UAGCACCAUCUGAAUUCGGUU    | C  | C  | NC |
| hsa-miR-198    | GGUCCAGAGGGGAGAUAGG      | NC | C  | C  |
| hsa-miR-422b   | CUGGACUUGGAGUCAGAAGGCC   | NC | C  | C  |
| hsa-miR-151    | ACUAGACUGAAGCUCCUUGAGG   | C  | C  | C  |
| hsa-miR-148b   | UCAGUGCAUCACAGAACUUUGU   | C  | C  | C  |
| hsa-miR-28     | AAGGAGCUCACAGUCUAUUGAG   | C  | C  | C  |
| hsa-miR-518f*  | CUCUAGAGGGAAGCACUUUCUCU  | NC | C  | C  |
| hsa-miR-30d    | UGUAAACAUCCCCGACUGGAAG   | C  | C  | C  |
| hsa-miR-126    | UCGUACCGUGAGUAAUAUGC     | C  | C  | C  |
| hsa-miR-27b    | UUCACAGUGGCUAAGUUCUGC    | C  | C  | C  |
| hsa-miR-24     | UGGCUAGUUCAGCAGGAACAG    | C  | C  | C  |
| hsa-miR-187    | UCGUGUCUUGUGUUGCAGCCG    | C  | C  | NC |
| hsa-miR-512-3p | AAGUGCUGUCAUAGCUGAGGUC   | NC | NC | C  |
| hsa-miR-492    | AGGACCUGCGGGACAAGAUUCUU  | NC | C  | C  |
| hsa-miR-526b   | CUCUUGAGGGAAGCACUUUCUGUU | NC | C  | C  |
| hsa-miR-650    | AGGAGGCAGCGCUCUCAGGAC    | NC | C  | C  |

Table S2

|                |                          |    |    |    |
|----------------|--------------------------|----|----|----|
| hsa-miR-101    | UACAGUACUGUGAUAAACUGAAG  | C  | C  | C  |
| hsa-miR-564    | AGGCACGGUGUCAGCAGGC      | NC | NC | C  |
| hsa-miR-574    | CACGCUCAUGCACACACCCAC    | C  | NC | NC |
| hsa-miR-520h   | ACAAAGUGCUUCCCUUAGAGU    | NC | C  | C  |
| hsa-miR-520g   | ACAAAGUGCUUCCCUUAGAGUGU  | NC | C  | C  |
| hsa-miR-30a-5p | UGUAAACAUCUCGACUGGAAG    | C  | C  | C  |
| hsa-miR-193b   | AACUGGCCCUCAAAGUCCCGCUUU | C  | C  | NC |
| hsa-miR-301    | CAGUGCAAUAGUAUUGUCAAGC   | C  | C  | C  |
| hsa-miR-565    | GGCUGGCUCGCGAUGUCUGUUU   | NC | NC | NC |
| hsa-miR-7      | UGGAAGACUAGUGAUUUUGUUG   | C  | C  | C  |
| hsa-miR-135a   | UAUGGCUUUUAUUCUAUGUGA    | C  | C  | C  |
| hsa-miR-422a   | CUGGACUUAGGGUCAGAAGGCC   | NC | NC | C  |
| hsa-miR-99b    | CACCCGUAGAACCGACCUUGCG   | C  | C  | C  |
| hsa-miR-206    | UGGAAUGUAAGGAAGUGUGUGG   | C  | C  | C  |
| hsa-miR-365    | UAAUGCCCCUAAAAUCCUUAU    | C  | C  | C  |
| hsa-miR-572    | GUCCGCUCGGCGGUGGCCCA     | NC | C  | C  |
| hsa-miR-505    | GUCAACACUUGCUGGUUCCUC    | C  | C  | C  |
| hsa-miR-146b   | UGAGAACUGAAUCCAUAGGCU    | C  | NC | C  |
| hsa-miR-517c   | AUCGUGCAUCCUUUAGAGUGU    | NC | C  | C  |
| hsa-miR-124a   | UUAAGGCACGCGUGAAUGCCA    | C  | C  | C  |
| hsa-miR-27a    | UUCACAGUGGCUAAGUUCGCG    | C  | C  | C  |
| hsa-miR-519d   | CAAAGUGCCUCCCUUAGAGUGU   | NC | C  | C  |
| hsa-miR-324-3p | CCACUGCCCCAGGUGCUGCUGG   | C  | C  | C  |
| hsa-miR-210    | CUGUGCGUGUGACAGCGGUGA    | C  | C  | C  |
| hsa-miR-373*   | ACUCAAAUGGGGGCGCUUCC     | NC | NC | C  |
| hsa-miR-497    | CAGCAGCACACUGUGGUUGU     | C  | C  | C  |
| hsa-miR-636    | UGUGCUUGCUCGUCCCGCCGCGAG | NC | C  | C  |
| hsa-miR-484    | UCAGGCUCAGUCCCCUCCGAU    | C  | C  | C  |
| hsa-miR-205    | UCCUUCAUUCCACCGGAGUCUG   | C  | C  | C  |
| hsa-miR-296    | AGGGCCCCCCCUCAAUCCUGU    | C  | C  | C  |
| hsa-miR-186    | CAAAGAAUUCUCCUUUUGGCUU   | C  | C  | C  |
| hsa-miR-519c   | AAAGUGCAUCUUUUUAGAGGAU   | NC | C  | C  |
| hsa-miR-30e-3p | CUUUCAGUCGGAUGUUUACAGC   | C  | C  | C  |
| hsa-miR-15a    | UAGCAGCACAUAAUGGUUUGUG   | C  | C  | C  |
| hsa-miR-214    | ACAGCAGGCACAGACAGGCAG    | C  | C  | C  |
| hsa-miR-192    | CUGACCUAUGAAUUGACAGCC    | C  | C  | C  |
| hsa-miR-331    | GCCCCUGGGCCUAUCCUAGAA    | C  | C  | C  |
| hsa-miR-223    | UGUCAGUUUGUCAAUACCCC     | C  | C  | C  |
| hsa-miR-34a    | UGGCAGUGUCUUAGCUGGUUGUU  | C  | C  | C  |
| hsa-miR-197    | UUCACCACCUUCUCCACCCAGC   | C  | C  | C  |
| hsa-miR-520d   | AAAGUGCUUCUUCUUUGGUGGUU  | NC | C  | C  |
| hsa-miR-601    | UGGUCUAGGAUUGUUGGAGGAG   | NC | C  | C  |
| hsa-miR-598    | UACGUCAUCGUUGUCAUCGUCA   | NC | NC | C  |
| hsa-miR-191*   | GCUGCGCUUGGAUUUCGUCCCC   | C  | C  | C  |
| hsa-miR-515-5p | UUCUCCAAAAGAAAGCACUUUCUG | NC | NC | C  |
| hsa-miR-557    | GUUUGCACGGGUGGGCCUUGUCU  | NC | NC | C  |
| hsa-miR-520c   | AAAGUGCUUCUUUUAGAGGUU    | NC | C  | C  |
| hsa-miR-149    | UCUGGCUCCGUGUCUUCACUCC   | C  | C  | C  |

Table S2

|                |                           |    |    |    |
|----------------|---------------------------|----|----|----|
| hsa-miR-489    | AGUGACAUCACAUUACGGCAGC    | NC | C  | NC |
| hsa-miR-31     | GGCAAGAUGCUGGCAUAGCUG     | C  | C  | C  |
| hsa-miR-525    | CUCCAGAGGGAUGCACUUUCU     | NC | C  | C  |
| hsa-miR-18a*   | ACUGCCCUAAGUGCUCUUUCU     | C  | NC | C  |
| hsa-miR-519e*  | AAAGUGCCUCCUUUAGAGUGU     | NC | NC | C  |
| hsa-miR-520f   | AAGUGCUUCCUUUAGAGGGU      | NC | NC | C  |
| hsa-miR-593    | AGGCACCAGCCAGGCAUUGCUCAGC | NC | NC | NC |
| hsa-miR-125b   | UCCCUAGAGCCCUAACUUGUGA    | C  | C  | C  |
| hsa-miR-204    | UCCCCUUUGUCAUCCUAUGCCU    | C  | C  | C  |
| hsa-miR-623    | AUCCCUUGCAGGGGUGUUGGGU    | NC | C  | C  |
| hsa-miR-519b   | AAAGUGCAUCCUUUAGAGGUU     | NC | C  | C  |
| hsa-miR-628    | UCUAGUAAGAGUGGCAGUCG      | C  | C  | C  |
| hsa-miR-22     | AAGCUGCCAGUUGAAGAACUGU    | C  | NC | C  |
| hsa-miR-194    | UGUAACAGCAACUCCAUGUGGA    | C  | C  | C  |
| hsa-miR-199a*  | UACAGUAGUCUGCACAUUGGUU    | C  | C  | C  |
| hsa-miR-340    | UCCGUCUCAGUUACUUUAUAGCC   | C  | C  | C  |
| hsa-miR-520a*  | AAAGUGCUUCCCUUUGGACUGU    | NC | NC | NC |
| hsa-miR-615    | UCCGAGCCUGGGUCUCCUCU      | C  | C  | C  |
| hsa-miR-200a   | UAACACUGUCUGGUAACGAUGU    | C  | C  | C  |
| hsa-miR-155    | UUAUUGCUAAUCGUGAUAGGGG    | C  | C  | C  |
| hsa-miR-660    | UACCAUUGCAUAUCGGAGUUG     | C  | C  | C  |
| hsa-miR-181b   | AACAUCUUGCUGUCGGUGGG      | C  | C  | C  |
| hsa-miR-518b   | CAAAGCGCUCCCCUUAGAGGU     | NC | C  | C  |
| hsa-miR-532    | CAUGCCUUGAGUGUAGGACCGU    | C  | C  | C  |
| hsa-miR-30e-5p | UGUAAACAUCUUGACUGGA       | C  | C  | C  |
| hsa-miR-560    | GCGUGCGCCGGCCGCGCC        | NC | NC | C  |
| hsa-miR-362    | AAUCCUUGGAACCUAGGUGUGAGU  | C  | C  | C  |
| hsa-miR-425-3p | AUCGGGAUUGUCGUGUCCGCC     | C  | C  | C  |
| hsa-miR-9*     | UAAAGCUAGAUAAACCGAAAGU    | C  | C  | C  |
| hsa-miR-625    | AGGGGGAAAGUUCUAUAGUCCU    | NC | NC | C  |
| hsa-miR-518f   | AAAGCGCUUCUCUUUAGAGGA     | NC | NC | C  |
| hsa-miR-429    | UAAUACUGUCUGGUAAGACCGU    | NC | C  | C  |
| hsa-miR-141    | UAACACUGUCUGGUAAGAUAGG    | C  | C  | C  |
| hsa-miR-345    | UGCUGACUCCUAGUCCAGGGC     | NC | C  | C  |
| hsa-miR-424    | CAGCAGCAAUUAUGUUUUGAA     | C  | C  | C  |
| hsa-miR-150    | UCUCCCAACCCUUGUACCAGUG    | C  | C  | C  |
| hsa-miR-522    | AAAUGGUUCCCUUAGAGUGUU     | NC | C  | C  |
| hsa-miR-224    | CAAGUCACUAGUGGUUCCGUUUA   | C  | C  | C  |
| hsa-miR-520b   | AAAGUGCUUCCUUUAGAGGG      | NC | C  | C  |
| hsa-miR-9      | UCUUUGGUUAUCUAGCUGUAUGA   | C  | C  | C  |
| hsa-miR-202    | AGAGGUUAUAGGGCAUGGGAAAA   | NC | NC | C  |
| hsa-miR-188    | CAUCCCUUGCAUGGUGGAGGGU    | C  | C  | C  |
| hsa-miR-200a*  | CAUCUUAACGGACAGUCUGGA     | C  | C  | C  |
| hsa-miR-518e   | AAAGCGCUUCCCUUCAGAGUGU    | NC | NC | C  |
| hsa-miR-142-5p | CAUAAAGUAGAAAGCACUAC      | C  | C  | C  |
| hsa-miR-423    | AGCUCGGUCUGAGGCCCCUCAG    | C  | C  | C  |
| hsa-miR-181a   | AACAUUAACGCUGUCGGUGAGU    | C  | C  | C  |
| hsa-miR-526c   | CUCUAGAGGGAAGCGCUUUCUGUU  | NC | C  | C  |

Table S2

|                |                          |    |    |    |
|----------------|--------------------------|----|----|----|
| hsa-miR-17-3p  | ACUGCAGUGAAGGCACUUGU     | C  | NC | C  |
| hsa-miR-181d   | AACAUUCAUUGUUGUCGGUGGGUU | C  | C  | C  |
| hsa-miR-563    | AGGUUGACAUACGUUUCCC      | NC | NC | C  |
| hsa-miR-629    | GUUCUCCCAACGUAAGCCCAGC   | NC | NC | NC |
| hsa-miR-203    | GUGAAAUGUUUAGGACCACUAG   | C  | C  | C  |
| hsa-miR-589    | UCAGAACAAAUGCCGGUUCCCAGA | NC | NC | C  |
| hsa-miR-452    | UGUUUGCAGAGGAAACUGAGAC   | C  | C  | C  |
| hsa-miR-654    | UGGUGGGCCGCAGAACAUUGUC   | NC | C  | C  |
| hsa-miR-145    | GUCCAGUUUUCCCAGGAAUCCCUU | C  | C  | C  |
| hsa-miR-526b*  | AAAGUGCUUCCUUUUAGAGGC    | NC | C  | C  |
| hsa-miR-324-5p | CGCAUCCCCUAGGGCAUUGGUGU  | C  | C  | C  |
| hsa-miR-146a   | UGAGAACUGAAUCCAUGGGUU    | C  | C  | C  |
| hsa-miR-652    | AAUGGCGCCACUAGGGUUGUGCA  | C  | C  | C  |
| hsa-miR-515-3p | GAGUGCCUUCUUUUGGAGCGU    | NC | NC | C  |
| hsa-miR-519a   | AAAGUGCAUCCUUUUAGAGUGUAC | NC | NC | C  |
| hsa-miR-455    | UAUGUGCCUUUGGACUACAUCG   | C  | C  | C  |
| hsa-miR-105    | UCAA AUGCUCAGACUCCUGU    | C  | C  | C  |
| hsa-miR-143    | UGAGAUGAAGCACUGUAGCUC A  | C  | C  | C  |
| hsa-miR-486    | UCCUGUACUGAGCUGCCCCGAG   | C  | C  | C  |
| hsa-miR-542-5p | UCGGGGAUCAUCAUGUCACGAG   | C  | C  | NC |
| hsa-miR-363*   | CGGGUGGAUCACGAUGCAAUUU   | C  | C  | NC |
| hsa-miR-132    | UACAGUCUACAGCCAUGGUCG    | C  | C  | NC |
| hsa-miR-152    | UCAGUGCAUGACAGAACUUGGG   | C  | C  | C  |
| hsa-miR-500    | AUGCACCUGGGCAAGGAUUCUG   | NC | C  | C  |
| hsa-miR-122a   | UGGAGUGUGACAAUGGUGUUUGU  | C  | C  | C  |
| hsa-miR-659    | CUUGGUUCAGGGAGGGUCCCCA   | NC | NC | C  |
| hsa-miR-451    | AAACCGUUACCAUUACUGAGUUU  | C  | C  | C  |
| hsa-miR-30a-3p | CUUUCAGUCGGAUGUUUGCAGC   | C  | C  | C  |
| hsa-miR-590    | GAGCUUAUUCAUAAAAGUGCAG   | NC | C  | C  |
| hsa-miR-346    | UGUCUGCCCGCAUGCCUGCCUCU  | C  | C  | C  |
| hsa-miR-512-5p | CACUCAGCCUUGAGGGCACUUUC  | NC | NC | C  |
| hsa-miR-641    | AAAGACAUAGGAUAGAGUACCUC  | NC | NC | C  |
| hsa-miR-330    | GCAAAGCACACGGCCUGCAGAGA  | C  | C  | C  |
| hsa-miR-502    | AUCCUUGCUAUCUGGGUGCUA    | C  | C  | C  |
| hsa-miR-96     | UUUGGCACUAGCACAUUUUUGC   | C  | C  | C  |
| hsa-miR-634    | AACCAGCACCCCAACUUUGGAC   | NC | NC | C  |
| hsa-miR-215    | AUGACCUAUGAAUUGACAGAC    | C  | C  | C  |
| hsa-miR-133b   | UUGGUCCCCUUAACCAGCUA     | C  | C  | C  |
| hsa-miR-501    | AAUCCUUUGUCCCUUGGGUGAGA  | NC | C  | C  |
| hsa-miR-550    | UGUCUUACUCCUCAGGCACAU    | NC | C  | C  |
| hsa-miR-519e   | AAAGUGCCUCCUUUUAGAGUGU   | NC | NC | C  |
| hsa-miR-218    | UUGUGCUUGAUUAACCAUGU     | C  | C  | C  |
| hsa-miR-212    | UACAGUCUCCAGUCACGGCC     | C  | C  | NC |
| hsa-miR-133a   | UUGGUCCCCUUAACCAGCUGU    | C  | C  | C  |
| hsa-miR-503    | UAGCAGCGGGAACAGUUCUGCAG  | C  | C  | C  |
| hsa-miR-378    | CUCCUGACUCCAGGUCCUGUGU   | C  | C  | C  |
| hsa-miR-382    | GAAGUUGUUCGUGGUGGAUUCG   | C  | C  | C  |
| hsa-miR-520e   | AAAGUGCUUCCUUUUUGAGGG    | C  | NC | NC |

Table S2

|                |                          |    |    |    |
|----------------|--------------------------|----|----|----|
| hsa-miR-592    | UUGUGUCAAU AUGCGAUGAUGU  | C  | C  | C  |
| hsa-miR-631    | AGACCUGGCC CAGACCUCAGC   | NC | C  | C  |
| hsa-miR-527    | CUGCAAAGGGAAGCCCUUUCU    | NC | NC | C  |
| hsa-miR-450    | UUUUUGCGAUGUGUCCUAUA     | C  | C  | C  |
| hsa-miR-127    | UCGGAUCCGUCUGAGCUUGGCU   | C  | C  | C  |
| hsa-miR-495    | AAACAAACAUGGUGCACUUCUU   | C  | C  | C  |
| hsa-miR-100    | AACCCGUAGA UCCGAACUUGUG  | C  | C  | C  |
| hsa-miR-584    | UUAUGGUUUGCCUGGGACUGAG   | NC | C  | C  |
| hsa-miR-409-3p | CGAAUGUUGCUCGGUGAACCCCU  | C  | C  | C  |
| hsa-miR-504    | AGACCCUGGUCUGCACUCUAU    | C  | C  | C  |
| hsa-miR-647    | GUGGCUGCACUCACUUCUUC     | NC | NC | NC |
| hsa-miR-328    | CUGGCCCUCUCUGCCCUUCCGU   | C  | NC | C  |
| hsa-miR-29c    | UAGCACCAU UUGAAAUCGGU    | C  | C  | C  |
| hsa-miR-617    | AGACU UCCCAUUGAAGGUGGC   | NC | NC | C  |
| hsa-miR-370    | GCCUGCUGGGUGGAACCUGG     | C  | C  | C  |
| hsa-miR-624    | UAGUACCAGUACCUUGUGUUA    | NC | C  | C  |
| hsa-miR-524    | GAAGGCGCUUCCCUUUGGAGU    | NC | NC | C  |
| hsa-miR-608    | AGGGGUGUGUUGGGACAGCUCCGU | NC | NC | NC |
| hsa-miR-520d*  | UCUACAAAGGGAAGCCCUUUCUG  | NC | C  | C  |
| hsa-miR-453    | GAGGUUGUCCGUGGUGAGUUCG   | C  | C  | C  |
| hsa-miR-510    | UACUCAGGAGAGUGGCAAUCACA  | NC | NC | NC |
| hsa-miR-551b   | GCGACCCAUACUUGGUUUCAG    | C  | C  | C  |
| hsa-miR-199a   | CCCAGUGUUCAGACUACCUGUUC  | C  | C  | C  |
| hsa-miR-622    | ACAGUCUGCUGAGGUUGGAGC    | NC | NC | C  |
| hsa-miR-339    | UCCUGUCCUCCAGGAGCUCA     | C  | C  | C  |
| hsa-miR-448    | UUGCAUAUGUAGGAUGUCCCAU   | C  | C  | C  |
| hsa-miR-483    | UCACUCCUCUCCUCCGUCUUCU   | NC | NC | NC |
| hsa-miR-596    | AAGCCUGCCCGGCUCUCCGGG    | NC | NC | C  |
| hsa-miR-431    | UGUCUUGCAGGCCGUAUGCA     | C  | C  | NC |
| hsa-miR-211    | UUCCCUUUGUCAUCCUUCGCCU   | C  | C  | C  |
| hsa-miR-491    | AGUGGGGAACCCUCCAUGAGGA   | C  | C  | C  |
| hsa-let-7a     | UGAGGUAGUAGGUUGUAUAGUU   | C  | C  | C  |
| hsa-let-7f     | UGAGGUAGUAGAUUGUAUAGUU   | C  | C  | C  |
| hsa-let-7e     | UGAGGUAGGAGGUUGUAUAGU    | C  | C  | C  |
| hsa-let-7b     | UGAGGUAGUAGGUUGUGUGGUU   | C  | C  | C  |
| hsa-let-7i     | UGAGGUAGUAGUUUGUGCUGU    | C  | C  | NC |
| hsa-let-7c     | UGAGGUAGUAGGUUGUAUGGUU   | C  | C  | C  |
| hsa-let-7d     | AGAGGUAGUAGGUUGCAUAGU    | C  | C  | C  |
| hsa-let-7g     | UGAGGUAGUAGUUUGUACAGU    | C  | C  | C  |
