# Supplementary material
Source: publisher figshare collection journal article supplement (https://plos.figshare.com/articles/dataset/_/150158)
Supplement: Supplementary file [file 1]

Table S3

| miRNA        | log2(EB14/ ES) | Conserved (4 species) | Conserved (rhesus) | Conserved (chimpanzee) |
|--------------|----------------|-----------------------|--------------------|------------------------|
| hsa-miR-654  | 4.95           | NC                    | C                  | C                      |
| hsa-miR-513  | 3.90           | NC                    | C                  | C                      |
| hsa-miR-494  | 3.56           | C                     | C                  | C                      |
| hsa-miR-198  | 3.14           | NC                    | NC                 | C                      |
| hsa-miR-574  | 2.58           | C                     | NC                 | NC                     |
| hsa-miR-188  | 2.24           | C                     | C                  | C                      |
| hsa-miR-572  | 2.22           | NC                    | C                  | C                      |
| hsa-miR-658  | 1.98           | NC                    | NC                 | C                      |
| hsa-miR-206  | 1.96           | C                     | C                  | C                      |
| hsa-miR-223  | 1.89           | C                     | C                  | C                      |
| hsa-miR-601  | 1.86           | NC                    | C                  | C                      |
| hsa-miR-563  | 1.74           | NC                    | NC                 | C                      |
| hsa-miR-346  | 1.63           | C                     | C                  | C                      |
| hsa-miR-498  | 1.50           | NC                    | C                  | C                      |
| hsa-miR-373* | 1.46           | NC                    | NC                 | C                      |
| hsa-miR-373  | 1.27           | NC                    | C                  | C                      |
| hsa-miR-7    | 1.14           | C                     | C                  | C                      |
| hsa-miR-575  | 1.13           | NC                    | NC                 | C                      |
| hsa-miR-602  | 1.12           | NC                    | NC                 | NC                     |
| hsa-miR-612  | 1.09           | NC                    | NC                 | C                      |
| hsa-miR-371  | 1.06           | NC                    | C                  | C                      |
| hsa-miR-367  | 1.01           | C                     | C                  | C                      |
| hsa-miR-27b  | -1.04          | C                     | C                  | C                      |
| hsa-miR-18b  | -1.12          | C                     | C                  | C                      |
| hsa-miR-18a  | -1.13          | C                     | C                  | C                      |
| hsa-miR-125a | -1.31          | C                     | C                  | C                      |
| hsa-miR-181b | -1.53          | C                     | C                  | C                      |
| hsa-miR-31   | -1.65          | C                     | C                  | C                      |
| hsa-miR-594  | -1.85          | NC                    | NC                 | C                      |
| hsa-let-7a   | -1.87          | C                     | C                  | C                      |
